# Supplementary material
Source: Springer Nature journal article supplement (https://www.springermedizin.de/resource/supplementary/12877_2014_1048_MOESM9_ESM.pdf/9440702)
Supplement: MOESM9 [file 9440702]

Table 4. Multiple regression models for predicting SPBC (70)

|              | Variable | Coefficient | T-Value | P-Value | R <sup>2</sup> |
|--------------|----------|-------------|---------|---------|----------------|
| SPBC (70) MF | GNI      | 0.001       | 1.28    | 0.001   | 0.376          |
|              | PEHGDP   | 13.01       | 1.78    |         |                |
|              | FMTS     | 1.763       | 3.93    | 0.001   | 0.391          |
|              | ISF      | 1.385       | 0.92    |         |                |
|              | PEHGDP   | 10.47       | 1.56    | 0.001   | 0.421          |
|              | FMTS     | 1.277       | 2.01    |         |                |
| SPBC (70) M  | GNI      | 0.003       | 0.77    | 0.005   | 0.225          |
|              | PEHGDP   | 4.052       | 1.35    |         |                |
|              | FMTS     | 0.541       | 2.63    | 0.007   | 0.291          |
|              | ISF      | 0.536       | 0.89    |         |                |
|              | PEHGDP   | 2.311       | 0.84    | 0.007   | 0.289          |
|              | FMTS     | 0.467       | 1.81    |         |                |
| SPBC (70) F  | GNI      | 0.002       | 1.35    | 0.001   | 0.392          |
|              | PEHGDP   | 20.23       | 1.82    |         |                |
|              | FMTS     | 2.769       | 3.52    | 0.001   | 0.406          |
|              | ISF      | 2.181       | 0.95    |         |                |
|              | PEHGDP   | 16.41       | 1.61    | 0.001   | 0.438          |
|              | FMTS     | 2.011       | 2.09    |         |                |

SPBC (70): Survival probability of becoming a centenarian for those aged 70 (per 10,000)

MF: Females and Males, M: Males, F: Females

GNI: Gross National Income per capita (constant 2005 international \$) (1990-2010)

PEHGDP: Public expenditure on health as a percentage of GDP (% of GDP) (2000-2010)

FMTS: Fixed and mobile telephone subscribers (per 100 people) (1980-1990)

ISF: Proportion of the population using improved sanitation facilities (%), urban (2005-2010)
